# Supplementary material
Source: HighWire-hosted journal article supplement (https://jnis.bmj.com/content/13/2/141)
Supplement: inline-supplementary-material-1 [file inline-supplementary-material-1.pdf]

## Supplemental Data

**Table e-1.** Summary of studies included in the systematic review

| Author, Year, Reference country        | Study design                                             | Population                                                     | Cervical ICA lesion             | ASPECTS                                  | IV tPA        | Intervention (Order of c-ICA stenting and EVT, stent type) | Comparison (c-ICA management in control group) | Follow-up (months) |
|----------------------------------------|----------------------------------------------------------|----------------------------------------------------------------|---------------------------------|------------------------------------------|---------------|------------------------------------------------------------|------------------------------------------------|--------------------|
| Wang, 2003, USA <sup>13</sup>          | Retrospective cohort study                               | 6 adults, median age 59.5 years, 3 female, NIHSS not specified | 6 atherosclerotic               | Not specified                            | Not specified | Stenting after EVT, Stent type not specified               | Angioplasty or CEA                             | 2-7                |
| Srinivasan, 2006, Canada <sup>12</sup> | Retrospective cohort study                               | 7 adults, median age 54 years, 4 female, median NIHSS 17       | 1 dissection, 6 atherosclerotic | Not specified                            | Not specified | Stenting after EVT, Wallstent                              | No intervention                                | 1 - 40             |
| Li, 2012, Taiwan <sup>11</sup>         | Retrospective cohort study                               | 7 adults, median age 65 years, 4 female, median NIHSS 23       | Type of lesion not specified    | Not specified                            | Not specified | Not specified                                              | Angioplasty or no intervention                 | 1                  |
| Machi, 2012, France <sup>18</sup>      | Cohort study, data from prospectively collected database | 10 adults, median age 69.5 years, 6 female,                    | 1 dissection, 9 atherosclerotic | Data for AS and NAS groups not specified | 7/10          | Order of stenting and EVT not specified, Xact, LEO         | Thromboaspiration                              | 3                  |

|                                         |                                                         |                                                                             |                                                         |                                                |                  |                                                                                    |                                             |   |
|-----------------------------------------|---------------------------------------------------------|-----------------------------------------------------------------------------|---------------------------------------------------------|------------------------------------------------|------------------|------------------------------------------------------------------------------------|---------------------------------------------|---|
|                                         |                                                         | median<br>NIHSS 19                                                          |                                                         |                                                |                  |                                                                                    |                                             |   |
| Fahed, 2016,<br>France <sup>17</sup>    | Cohort study,<br>prospectively<br>collected<br>database | 70 adults,<br>mean age<br>62.6 years,<br>21 female,<br>median<br>NIHSS 16   | 13 dissections,<br>38<br>atherosclerotic,<br>13 embolic | Data for AS and<br>NAS groups not<br>specified | 52/70            | Order of stenting<br>and EVT not<br>specified, Wallstent                           | Angioplasty                                 | 3 |
| Sallustio, 2017,<br>Italy <sup>20</sup> | Cohort study,<br>prospectively<br>collected<br>database | 72 adults,<br>mean age<br>65.6 years,<br>28 female,<br>mean<br>NIHSS 19     | Type of lesion<br>not specified                         | Data for AS and<br>NAS groups not<br>specified | 39/72            | Not specified                                                                      | Angioplasty or no<br>intervention           | 3 |
| Akpinar, 2018,<br>Turkey <sup>9</sup>   | Retrospective<br>cohort study                           | 8 adults,<br>median age<br>59 years, 2<br>female,<br>median<br>NIHSS 19     | 3 dissections, 5<br>atherosclerotic                     | Not specified                                  | Not<br>specified | Stenting before<br>EVT,<br>Wallstent                                               | Not specified                               | 3 |
| Assis, 2018,<br>Canada <sup>25</sup>    | Post-hoc<br>analysis of<br>RCT<br>subgroup              | 30 adults,<br>median age<br>66.2 years,<br>10 female,<br>median<br>NIHSS 16 | Type of lesion<br>not specified                         | Data for AS and<br>NAS groups not<br>specified | Not<br>specified | 50% stenting before<br>EVT, 50% stenting<br>after EVT, Stent<br>type not specified | Angioplasty, CEA<br>or<br>thromboaspiration | 3 |
| Blassiau, 2018,<br>France <sup>16</sup> | Cohort study,<br>prospectively<br>collected<br>database | 35 adults,<br>mean age<br>64.6 years,<br>5 female,                          | 10 dissections,<br>25<br>atherosclerotic                | Data for AS and<br>NAS groups not<br>specified | 23/35            | Not specified                                                                      | Angioplasty, CEA<br>or delayed stenting     | 3 |

|                                                       |                               |                                                                            |                                                                  |                                                                   |                  |                                                                                                        |                                                                                 |   |
|-------------------------------------------------------|-------------------------------|----------------------------------------------------------------------------|------------------------------------------------------------------|-------------------------------------------------------------------|------------------|--------------------------------------------------------------------------------------------------------|---------------------------------------------------------------------------------|---|
|                                                       |                               | mean<br>NIHSS<br>17.3                                                      |                                                                  |                                                                   |                  |                                                                                                        |                                                                                 |   |
| Bricout, 2018,<br>France <sup>8</sup>                 | Prospective<br>cohort study   | 83 adults,<br>median age<br>61 years,<br>25 female,<br>median<br>NIHSS 18  | 19 dissections,<br>51<br>atherosclerotic,<br>13<br>other/unknown | Not specified                                                     | 71/83            | Not specified                                                                                          | Angioplasty or no<br>intervention                                               | 3 |
| Eker, 2018,<br>France <sup>14</sup>                   | Retrospective<br>cohort study | 121 adults,<br>median age<br>72 years,<br>31 female,<br>median<br>NIHSS 17 | 121<br>atherosclerotic                                           | Not specified                                                     | Not<br>specified | Order of stenting<br>and EVT not<br>specified, Wallstent,<br>Precise, Critallo<br>ideale, Xact, Casper | Angioplasty or<br>deferred stenting<br>(defined as 2 to 5<br>days after stroke) | 3 |
| Labeyrie, 2018,<br>France <sup>10</sup>               | Retrospective<br>cohort study | 42 adults,<br>median age<br>63 years,<br>12 female,<br>median<br>NIHSS 15  | 17 dissections,<br>21<br>atherosclerotic,<br>4 embolic           | Data for AS and<br>NAS groups not<br>specified                    | 30/42            | Order of stenting<br>and EVT not<br>specified, Wallstent                                               | Coil occlusion,<br>thrombectomy,<br>angioplasty or<br>thromboaspiration         | 3 |
| Li, 2018, China <sup>7</sup>                          | Prospective<br>cohort study   | 37 adults,<br>median age<br>61 years,<br>10 female,<br>median<br>NIHSS 15  | 15 dissections,<br>22<br>atherosclerotic                         | Median<br>AS group: 9<br>NAS group:<br>8<br>p=non-<br>significant | 12/37            | Order of stenting<br>and EVT not<br>specified, Precise,<br>Acculink, Wallstent                         | Angioplasty                                                                     | 3 |
| Papanagiotou,<br>2018,<br>Multinational <sup>15</sup> | Retrospective<br>cohort study | 482 adults,<br>mean age<br>63.8 years,                                     | 105 dissections,<br>329                                          | Mean<br>1.AS+antiplatelet<br>therapy 8.2±1.6                      | 296/482          | Not specified                                                                                          | Angioplasty or no<br>intervention                                               | 3 |

|                                             |                                                |                                                                                 |                                      |                                                                                                                                                 |         |                                                                  |                                |   |
|---------------------------------------------|------------------------------------------------|---------------------------------------------------------------------------------|--------------------------------------|-------------------------------------------------------------------------------------------------------------------------------------------------|---------|------------------------------------------------------------------|--------------------------------|---|
|                                             |                                                | 169 female, mean NIHSS 15.9                                                     | atherosclerotic, 48 embolic          | 2.AS+no antiplatelet therapy 7.3±1.9<br>3.Angioplasty 7.5±1.7<br>4. EVT alone 7.2±2.1<br><br>p<0.001 for group 1 vs 4<br>Others non-significant |         |                                                                  |                                |   |
| Sadeh-Gonik, 2018, France <sup>19</sup>     | Cohort study, prospectively collected database | 46 adults, mean age 69.5 years, 14 female, mean NIHSS 15.9                      | 17 dissections, others not specified | Data for AS and NAS groups not specified                                                                                                        | 35/46   | Stenting after EVT, Stent type not specified                     | Not specified                  | 3 |
| Jadhav, 2019 USA <sup>1</sup>               | Retrospective cohort study                     | 147 adults, mean age 63.3 years, number of females not specified, mean NIHSS 17 | Type of lesion not specified         | Mean AS group 7.8±1.7<br>NAS group 7.8±1.8<br>p=0,988                                                                                           | 109/147 | Not specified                                                    | Angioplasty or no intervention | 3 |
| Kang, 2019, Republic of Korea <sup>22</sup> | Cohort study, prospectively collected database | 62 adults, median age 69 years, 8 female,                                       | 62 atherosclerotic                   | Median overall 8.0 (6.0-8.0)<br>p=0.714 between groups                                                                                          | 25/62   | PTA before EVT in all, 9 stented before EVT, Wallstent, Acculink | Angioplasty alone              | 3 |

|                                                       |                                                         | median<br>NIHSS 15                                                           |                                                    | (ASPECTS-<br>DWI)                                  |        |                                                                                |                                   |      |
|-------------------------------------------------------|---------------------------------------------------------|------------------------------------------------------------------------------|----------------------------------------------------|----------------------------------------------------|--------|--------------------------------------------------------------------------------|-----------------------------------|------|
| Poppe, 2019,<br>Canada <sup>26</sup>                  | Randomized<br>controlled<br>pilot trial                 | 24 adults,<br>11 female,<br>median age<br>and NIHSS<br>unavailable           | 23<br>atherosclerotic,<br>1 embolic                | Median<br>AS group 8±4<br>NAS group 8±2            | 18/24  | 2/13 stented before<br>EVT, Stent type not<br>specified                        | Angioplasty or no<br>intervention | 3    |
| Wallocha, 2019,<br>Germany <sup>24</sup>              | Cohort study,<br>prospectively<br>collected<br>database | 163 adults,<br>mean age<br>67.6years,<br>45 female,<br>mean<br>NIHSS<br>14.6 | 163<br>atherosclerotic                             | Not specified                                      | 90/163 | Not specified                                                                  | Angioplasty                       | 3-60 |
| Hernandez-<br>Fernandez, 2020,<br>Spain <sup>21</sup> | Cohort study,<br>prospectively<br>collected<br>database | 40 adults,<br>mean age<br>66.7 years,<br>7 female,<br>median<br>NIHSS 17     | 5 dissections, 27<br>atherosclerotic,<br>3 embolic | Data for AS and<br>NAS groups not<br>specified     | 14/40  | Order of stenting<br>and EVT not<br>specified, Xact                            | Angioplasty                       | 3    |
| Kim, 2020,<br>Republic of<br>Korea <sup>23</sup>      | Cohort study,<br>prospectively<br>collected<br>database | 75 adults,<br>mean age<br>68 years,<br>16 female,<br>median<br>NIHSS 14      | Type of lesion<br>not specified                    | Median<br>AS group 8±2<br>NAS group 8±1<br>p=0.197 | 42/75  | Order of stenting<br>and EVT not<br>specified, Wallstent,<br>Acculink, Precise | Angioplasty                       | 3    |

CEA=Carotid endarterectomy, EVT=Endovascular thrombectomy, c-ICA=Cervical internal carotid artery, IV tPA=Intravenous tissue plasminogen activator, ASPECTS= Alberta Stroke Program Early CT Score, AS=Acute c-ICA stenting, NAS=No Acute c-ICA stenting

**Table e-2.** Risk of bias assessment of studies included in the systematic review

|                                                                 | Wang (2003) | Srinivasan (2006) | Li (2012) | Machi (2012) | Fahed (2016) | Sallustio (2017) | Akpinar (2018) | Assis (2018) | Blassiau (2018) | Bricout (2018) | Eker (2018) | Labeyrie (2018) | Li (2018) | Papanigioutou (2018) | Sadeh-Gonik (2018) | Jadhav (2019) | Kang (2019) | Poppe (2019) | Wallocha (2019) | Hernandez-Fernandez (2020) | Kim (2020) |
|-----------------------------------------------------------------|-------------|-------------------|-----------|--------------|--------------|------------------|----------------|--------------|-----------------|----------------|-------------|-----------------|-----------|----------------------|--------------------|---------------|-------------|--------------|-----------------|----------------------------|------------|
| Patient group formation (Selection bias)                        | -           | -                 | -         | -            | -            | -                | -              | -            | -               | -              | -           | -               | -         | -                    | -                  | -             | -           | ?            | -               | -                          | -          |
| Blinding of intervention (Performance bias)                     | -           | -                 | -         | -            | -            | -                | -              | -            | -               | ?              | -           | -               | ?         | -                    | -                  | -             | -           | -            | -               | -                          | -          |
| Subjective outcome assessment (mRS) (Detection bias)            | -           | -                 | -         | ?            | ?            | ?                | ?              | +            | ?               | ?              | +           | ?               | +         | ?                    | ?                  | ?             | ?           | -            | -               | ?                          | ?          |
| Objective outcome assessment (mortality, SICH) (Detection bias) | -           | -                 | -         | +            | +            | +                | +              | +            | +               | +              | +           | +               | +         | +                    | +                  | +             | +           | +            | -               | +                          | +          |
| Incomplete outcome data (Attrition bias)                        | ?           | ?                 | +         | +            | +            | -                | +              | +            | +               | +              | +           | ?               | -         | +                    | +                  | ?             | +           | +            | ?               | ?                          | -          |
| Selective reporting (Reporting bias)                            | ?           | ?                 | ?         | ?            | ?            | ?                | ?              | -            | ?               | ?              | ?           | ?               | ?         | ?                    | ?                  | ?             | ?           | ?            | ?               | ?                          | ?          |

|                                                                                     |                  |                                                                                     |                      |                                                                                     |                   |
|-------------------------------------------------------------------------------------|------------------|-------------------------------------------------------------------------------------|----------------------|-------------------------------------------------------------------------------------|-------------------|
|  | Low risk of bias |  | Unclear risk of bias |  | High risk of bias |
|-------------------------------------------------------------------------------------|------------------|-------------------------------------------------------------------------------------|----------------------|-------------------------------------------------------------------------------------|-------------------|

**Figure e-1.** Funnel plots for (A) mRS at 90-days and (B) sICH as outcomes showing no asymmetry

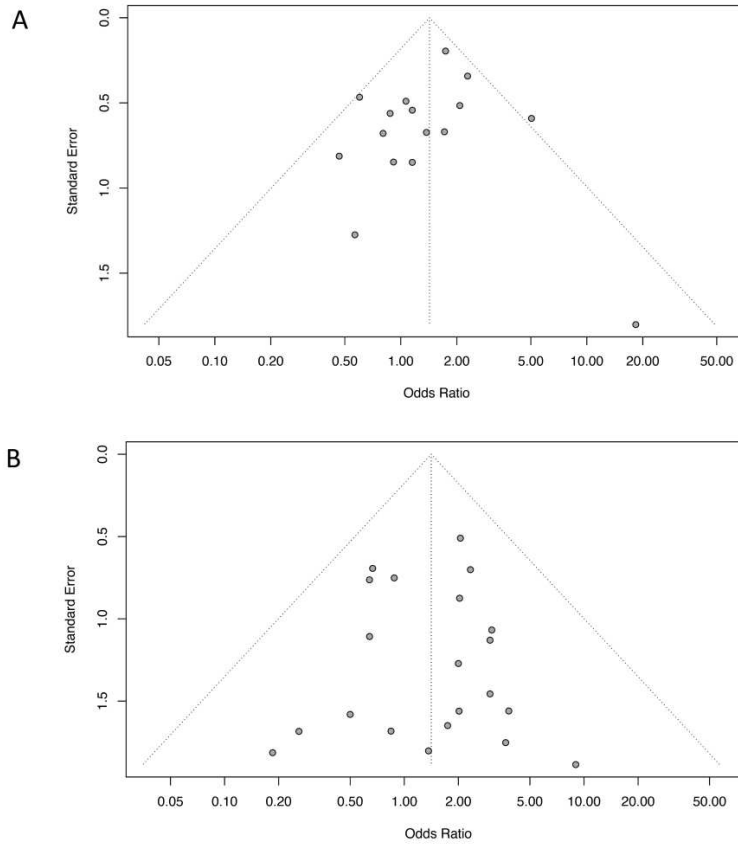

**Figure e-2.** Funnel plot for mortality at 90-days showing asymmetry and possible bias

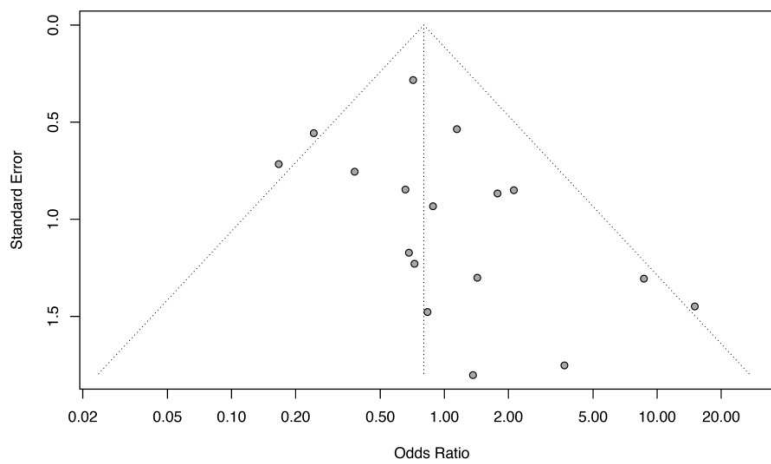

**Appendix e-1:** Detailed search strategy for systematic review

| <b><u>Database</u></b> |                                  |
|------------------------|----------------------------------|
| Database               | MEDLINE                          |
| Interface              | PubMed                           |
| Research date          | February 19 <sup>st</sup> , 2020 |
| Filters                | -                                |

| <b><u>Syntax</u></b>      |                         |
|---------------------------|-------------------------|
| [MeSH Terms]              | Medical Subject Heading |
| OR, AND                   | Boolean operators       |
| *                         | Truncation              |
| [Title/Abstract] / [tiab] | Title, Abstract         |
| [Other Term] / [ot]       | Author key words        |

| <b><u>Search strategy</u></b> |
|-------------------------------|
|-------------------------------|

"Carotid Artery, Internal"[Mesh] **OR** ICA[tiab] **OR** ICA[ot] **OR** "Carotid Artery Thrombosis"[Mesh] **OR** "Carotid Stenosis"[Mesh] **OR** "Carotid Artery, Internal, Dissection"[Mesh] **OR** carotid[tiab] **OR** carotid[ot]

**AND**

"Thrombectomy"[Mesh] **OR** thromboendarterectom\*[Title/Abstract] **OR** thromboendarterectom\*[Other Term] **OR** thrombectom\*[Title/Abstract] **OR** thrombectom\*[Other Term] **OR** thrombolys\*[Title/Abstract] **OR** thrombolys\*[Other Term]

**AND**

"Stents"[Mesh] **OR** Stent\*[tiab] **OR** Stent\*[ot] **OR** angioplast\*[tiab] **OR** angioplast\*[ot] **OR** "Angioplasty"[Mesh] **OR** "Angioplasty, Balloon"[Mesh]

**Total:** 703 references



| <b>Database</b> |                                               |
|-----------------|-----------------------------------------------|
| Database        | Ovid MEDLINE(R) ALL 1946 to February 18, 2020 |
| Interface       | OvidSP                                        |
| Research date   | February 19 <sup>st</sup> , 2020              |
| Filters         | -                                             |

| <b>Syntax</b> |                                                                  |
|---------------|------------------------------------------------------------------|
| /             | Exact Subject Heading                                            |
| */            | Focus on Exact Subject Heading                                   |
| tw            | Text word field in MEDLINE includes Title (TI) and Abstract (AB) |
| kw            | Keywords                                                         |
| sh            | Subject Heading                                                  |
| oa            | Other Abstract                                                   |
| kf            | Keyword Heading Word                                             |
| or, and       | Boolean operators                                                |
| adj2          | The Adjacent operator                                            |
| *             | Truncation                                                       |

### **Search strategy**

|   |                                                                                                                       |        |
|---|-----------------------------------------------------------------------------------------------------------------------|--------|
| 1 | Carotid Artery, Internal, Dissection/ or Carotid Artery Thrombosis/ or Carotid Stenosis/ or Carotid Artery, Internal/ | 30864  |
| 2 | (ICA or carotid).tw,kf,sh,kw,oa.                                                                                      | 127589 |
| 3 | 1 or 2                                                                                                                | 132275 |
| 4 | Thrombectomy/                                                                                                         | 6391   |
| 5 | (thromboendarterectom* or thrombectom* or thrombolys*).tw,kf,sh,kw,oa.                                                | 35121  |
| 6 | 4 or 5                                                                                                                | 35121  |
| 7 | Stents/                                                                                                               | 65661  |

|    |                                         |        |
|----|-----------------------------------------|--------|
| 8  | Angioplasty, Balloon/ or Angioplasty/   | 24304  |
| 9  | (stent* or angioplast*).tw,kf,sh,kw,oa. | 158879 |
| 10 | 7 or 8 or 9                             | 158879 |
| 11 | 3 and 6 and 10                          | 700    |

| <b><u>Database</u></b> |                                                                                                                                                                                                                                                                                                                                                                                                                                                                                                                                                                    |
|------------------------|--------------------------------------------------------------------------------------------------------------------------------------------------------------------------------------------------------------------------------------------------------------------------------------------------------------------------------------------------------------------------------------------------------------------------------------------------------------------------------------------------------------------------------------------------------------------|
| Databases              | EBM Reviews - Cochrane Database of Systematic Reviews 2005 to February 11, 2020,<br>EBM Reviews - ACP Journal Club 1991 to January 2020,<br>EBM Reviews - Database of Abstracts of Reviews of Effects 1st Quarter 2016,<br>EBM Reviews - Cochrane Clinical Answers January 2020,<br>EBM Reviews - Cochrane Central Register of Controlled Trials January 2020,<br>EBM Reviews - Cochrane Methodology Register 3rd Quarter 2012,<br>EBM Reviews - Health Technology Assessment 4th Quarter 2016,<br>EBM Reviews - NHS Economic Evaluation Database 1st Quarter 2016 |
| Interface              | OvidSP                                                                                                                                                                                                                                                                                                                                                                                                                                                                                                                                                             |
| Research date          | 19 <sup>st</sup> February, 2020                                                                                                                                                                                                                                                                                                                                                                                                                                                                                                                                    |
| Filters                | -                                                                                                                                                                                                                                                                                                                                                                                                                                                                                                                                                                  |

| <b><u>Syntax</u></b> |                                                                                        |
|----------------------|----------------------------------------------------------------------------------------|
| /                    | Exact Subject Heading                                                                  |
| kw                   | Keywords                                                                               |
| tw                   | Text word includes : (TI), Abstract (AB), Caption Text (CT), and Full Text (TX) fields |
| or, and              | Boolean operators                                                                      |
| *                    | Truncation                                                                             |
| adj2                 | The Adjacent operator                                                                  |

### **Search strategy**

|   |                            |     |
|---|----------------------------|-----|
| 1 | internal carotid artery/   | 172 |
| 2 | carotid artery thrombosis/ | 18  |
| 3 | carotid artery/            | 577 |

|    |                                                            |       |
|----|------------------------------------------------------------|-------|
| 4  | carotid artery obstruction/                                | 0     |
| 5  | carotid artery injury/                                     | 15    |
| 6  | (ICA or carotid).af.                                       | 9825  |
| 7  | or/1-6                                                     | 9825  |
| 8  | thrombectomy/                                              | 262   |
| 9  | (thromboendarterectom* or thrombectom* or thrombolys*).af. | 6773  |
| 10 | or/8-9                                                     | 6773  |
| 11 | stent/                                                     | 3277  |
| 12 | angioplasty/                                               | 331   |
| 13 | (stent* or angioplast*).af.                                | 24037 |
| 14 | carotid angioplasty/                                       | 0     |
| 15 | or/11-14                                                   | 24037 |
| 16 | 7 and 10 and 15                                            | 146   |

### **Database**

|               |                                 |
|---------------|---------------------------------|
| Databases     | CINAHL Complete                 |
| Interface     | EBSCO                           |
| Research date | 19 <sup>st</sup> February, 2020 |
| Filters       | -                               |

### **Syntax**

|                |                        |
|----------------|------------------------|
| MH             | Exact Subject Headings |
| S (1, 2, 3...) | Search                 |
| OR, AND        | Boolean operators      |

### **Search strategy**

| #  | Question                                                                                                                   | Résultats |
|----|----------------------------------------------------------------------------------------------------------------------------|-----------|
| S1 | ( (MH "Carotid Artery Dissections") OR (MH "Carotid Artery Thrombosis") OR (MH "Carotid Arteries") ) OR ( ICA or carotid ) | 21,951    |

|    |                                                                                                     |        |
|----|-----------------------------------------------------------------------------------------------------|--------|
| S2 | (MH "Thrombectomy") OR ( thromboendarterectom* or thrombectom* or thrombolys* )                     | 8,603  |
| S3 | ( (MH "Stents") OR (MH "Angioplasty") OR (MH "Angioplasty, Balloon") ) OR ( stent* or angioplast* ) | 37,759 |
| S4 | S1 AND S2 AND S3                                                                                    | 163    |

### **Database**

|               |                                  |
|---------------|----------------------------------|
| Database      | Embase 1974 to 2020 February 18  |
| Interface     | OvidSP                           |
| Research date | February 19 <sup>st</sup> , 2020 |
| Filters       | -                                |

### **Syntax**

|         |                                                                                        |
|---------|----------------------------------------------------------------------------------------|
| /       | Exact Subject Heading                                                                  |
| */      | Focus on Exact Subject Heading                                                         |
| tw      | Text word field in EMBASE includes Title (TI), Abstract (AB) and Drug Trade Name (TN). |
| kw      | Keywords                                                                               |
| sh      | Subject Heading                                                                        |
| or, and | Boolean operators                                                                      |
| adj2    | The Adjacent operator                                                                  |
| *       | Truncation                                                                             |

### **Search strategy**

|   |                             |        |
|---|-----------------------------|--------|
| 1 | internal carotid artery/    | 20851  |
| 2 | carotid artery thrombosis/  | 2125   |
| 3 | carotid artery obstruction/ | 27387  |
| 4 | carotid artery/             | 47871  |
| 5 | carotid artery injury/      | 4534   |
| 6 | (ICA or carotid).tw,sh,kw.  | 171933 |
| 7 | or/1-6                      | 185568 |

|    |                                                                  |        |
|----|------------------------------------------------------------------|--------|
| 8  | thrombectomy/                                                    | 12728  |
| 9  | (thromboendarterectom* or thrombectom* or thrombolys*).tw,sh,kw. | 60000  |
| 10 | or/8-9                                                           | 60000  |
| 11 | stent/                                                           | 87965  |
| 12 | angioplasty/                                                     | 24753  |
| 13 | (stent* or angioplast*).tw,sh,kw.                                | 229318 |
| 14 | carotid angioplasty/                                             | 646    |
| 15 | or/11-14                                                         | 229438 |
| 16 | 7 and 10 and 15                                                  | 1532   |

## Web of Science

|     |                         |                                                                                                                                              |
|-----|-------------------------|----------------------------------------------------------------------------------------------------------------------------------------------|
| # 4 | <a href="#">1074</a>    | #3 AND #2 AND #1<br>Indexes=SCI-EXPANDED, SSCI, A&HCI, CPCI-S, CPCI-SSH,<br>ESCI Timespan=All years                                          |
| # 3 | <a href="#">246,264</a> | TS=(stent* OR angioplast*)<br>Indexes=SCI-EXPANDED, SSCI, A&HCI, CPCI-S, CPCI-SSH,<br>ESCI Timespan=All years                                |
| # 2 | <a href="#">57,880</a>  | TS=(thrombectom* OR thromboendarterectom* OR thrombolys*)<br>Indexes=SCI-EXPANDED, SSCI, A&HCI, CPCI-S, CPCI-SSH,<br>ESCI Timespan=All years |
| # 1 | <a href="#">200,951</a> | TS=(carotid)<br>Indexes=SCI-EXPANDED, SSCI, A&HCI, CPCI-S, CPCI-SSH,<br>ESCI Timespan=All years                                              |
